# Supplementary material for: Oxygen vacancies enable excellent electrochemical kinetics of carbon coated mesoporous SnO2nanoparticles in lithium ion batteries
Source: Royal Society of Chemistry journal article supplement (doi:10.1039/d1ma00453k), 2021-12-14
Supplement: d1ma00453k2.pdf [file d1ma00453k2.pdf]

## Supporting information (SI)

### Oxygen Vacancies Enable Excellent Electrochemical Kinetics of Carbon Coated

#### Mesoporous SnO<sub>2</sub> Nanoparticles in Lithium Ion Battery

Boya Venugopal<sup>a,f,1\*</sup>, Parakandy Muzhikara Pratheeksha<sup>a,d,1</sup>, Khasim Saheb Bayikadi<sup>c</sup>, Pavan Srinivas Veluri<sup>a</sup>, Mantripragada Rama Krishna<sup>b</sup>, Bulusu Venkata Sarada<sup>c</sup>, Tata Narasinga Rao<sup>a</sup>, Paul Joseph Daniel<sup>d</sup> and Srinivasan Anandan<sup>a\*</sup>

<sup>a</sup> Centre for Nanomaterials, International Advanced Research Centre for Powder Metallurgy and New Materials, Hyderabad-500005, India.

<sup>b</sup> Centre for Material Characterization and Testing, International Advanced Research Centre for Powder Metallurgy and New Materials, Hyderabad-500005, India.

<sup>c</sup> Center for Solar Energy Materials, International Advanced Research Centre for Powder Metallurgy and New Materials, Hyderabad-500005, India.

<sup>d</sup> Department of Physics-National Institute of Technology, Warangal-506 004, India.

<sup>e</sup> Institute of Atomic and Molecular Sciences, Academia Sinica, Taipei 10617, Taiwan.

<sup>f</sup> Department of Engineering and System Science, National Tsing Hua University, Hsinchu, 30013, Taiwan.

#### Corresponding Authors

Email id: [b.venugopal77@gmail.com](mailto:b.venugopal77@gmail.com) and [anandan@arci.res.in](mailto:anandan@arci.res.in)

<sup>1</sup> These authors contributed equally to this work

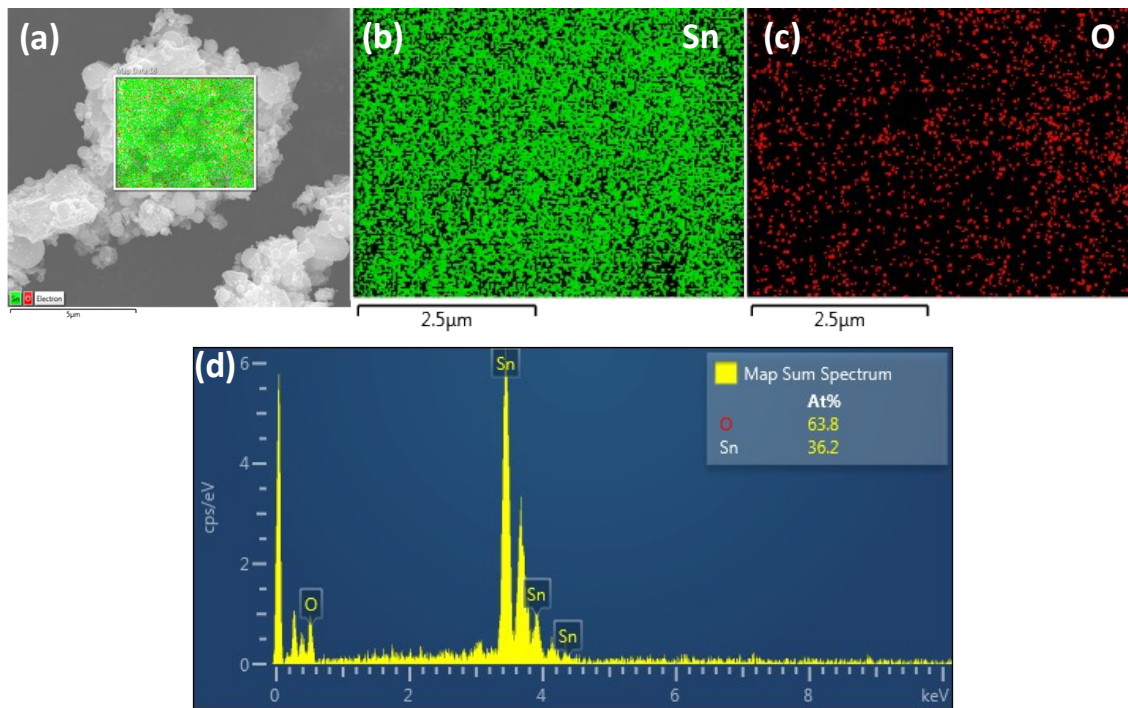

**Fig. S1** (a) SEM image of H-SnO<sub>2</sub> particles (calcined at 400 °C), (b-c) elemental mapping of Sn and O (d) EDS analysis of H-SnO<sub>2</sub>

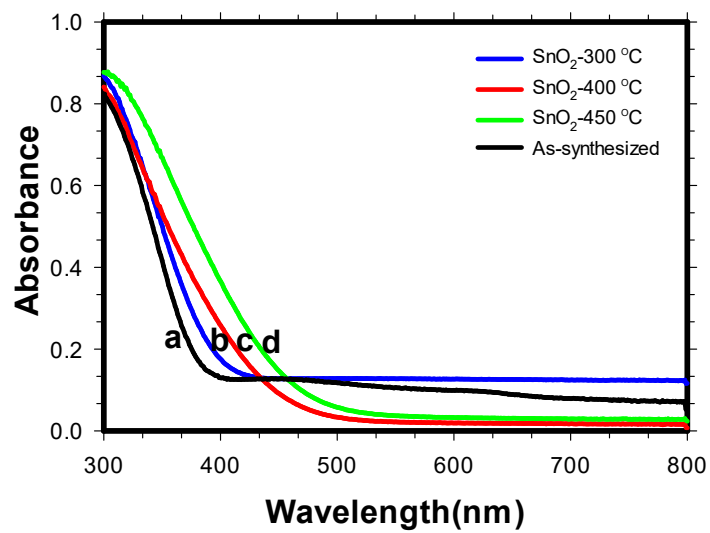

**Fig. S2:** UV-vis- absorption spectrum of (a) H-SnO<sub>2</sub> As-synthesized, H-SnO<sub>2</sub> calcined at (b) 300 °C, (c) 400 °C and (d) 450 °C.

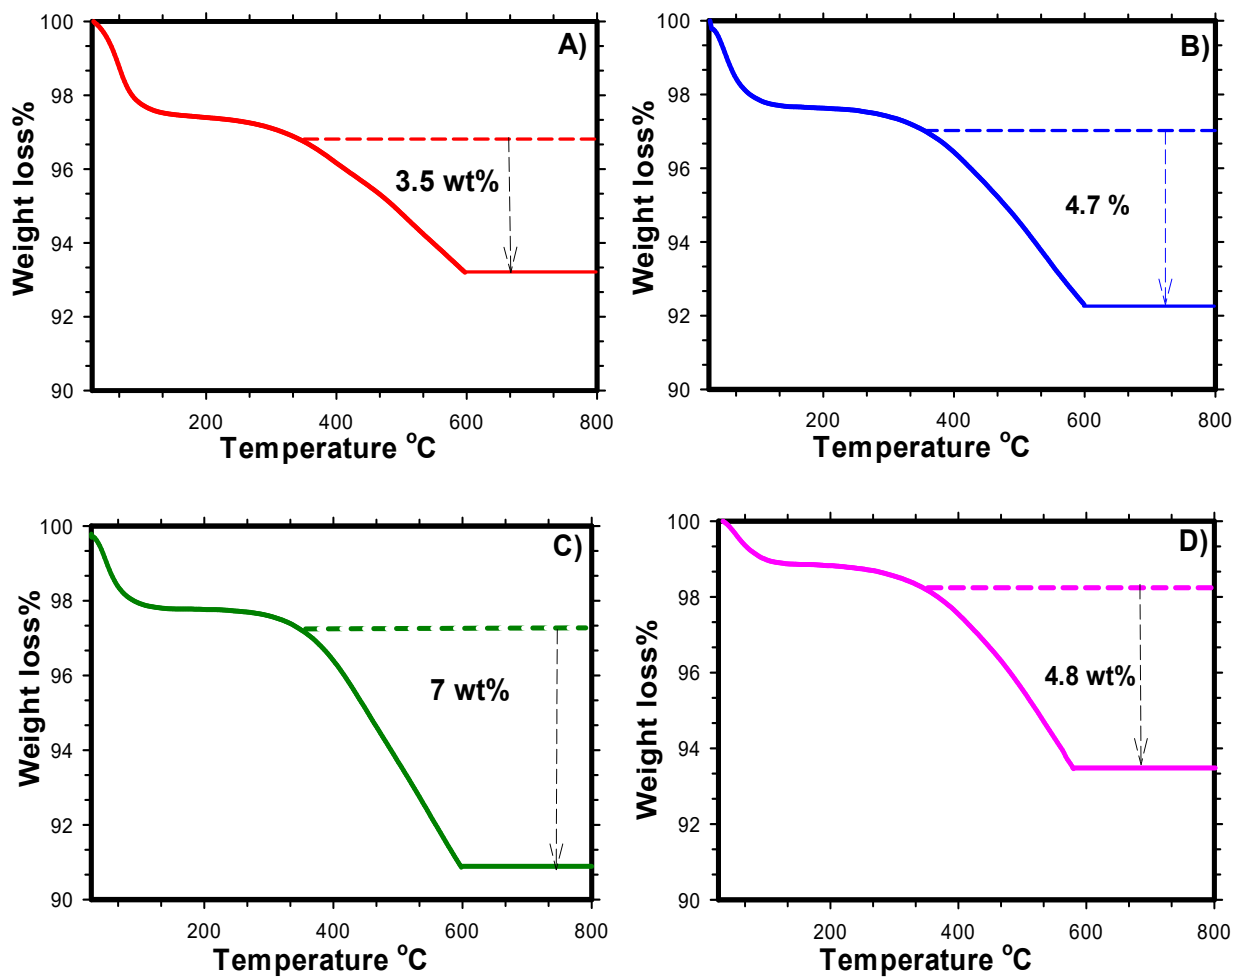

**Fig. S3:** TGA curves of the non-conventional carbon coated H-SnO<sub>2</sub>: (a) NCC-1 (b) NCC-2 (c) NCC-3 and (d) NCC-4.

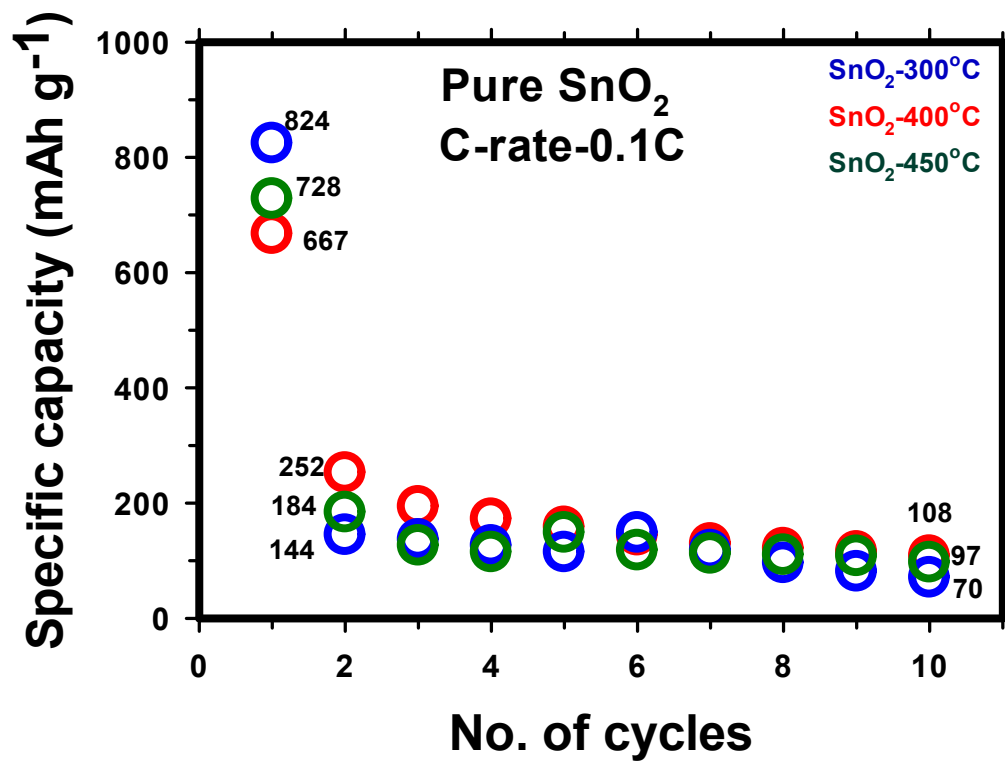

Fig. S4: Cyclic stability of pure SnO<sub>2</sub> tested at 0.1C rate

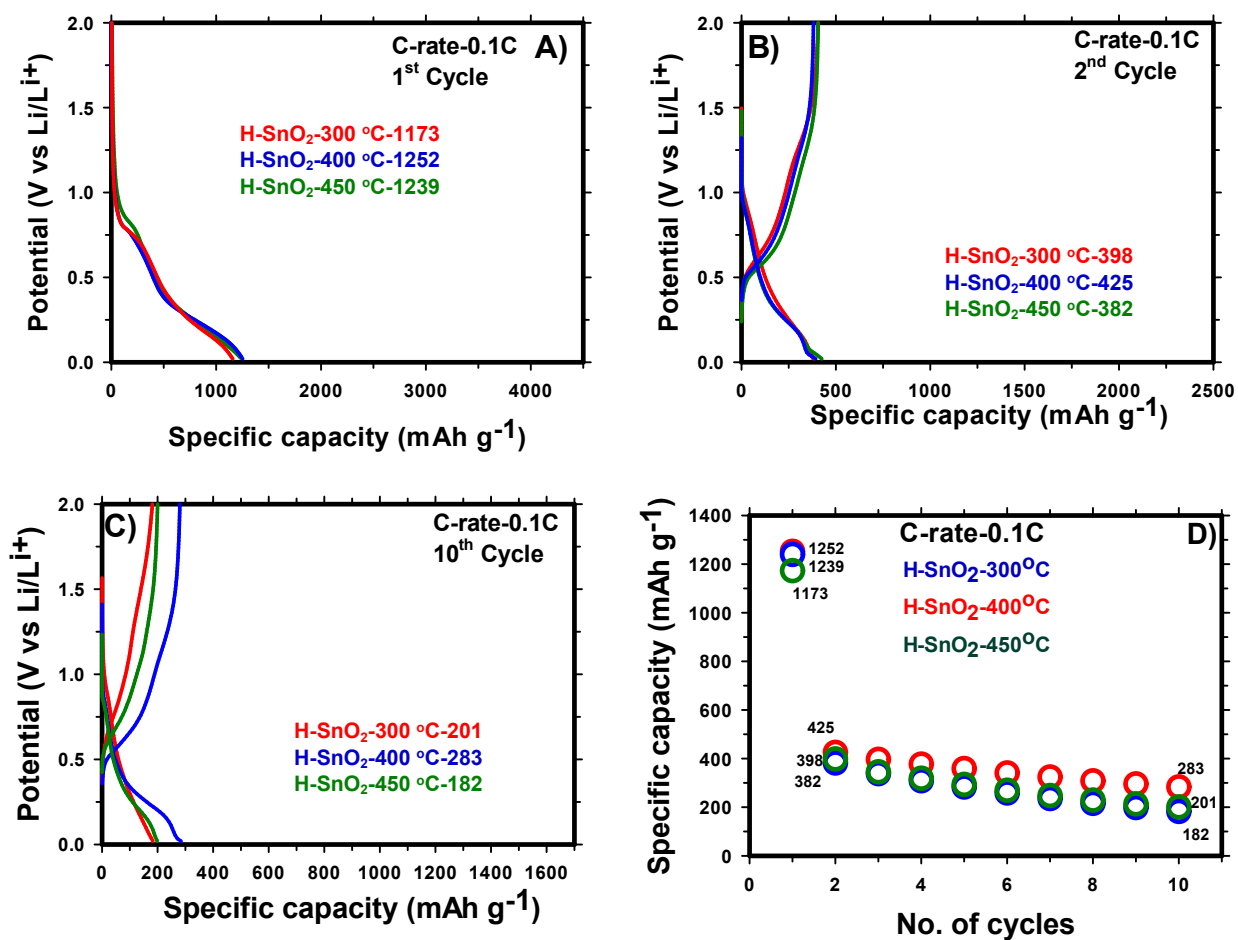

**Fig. S5:** Electrochemical performance of H-SnO<sub>2</sub> calcined at 300 °C, 400 °C and 450 °C tested at 0.1C (A) 1<sup>st</sup> cycle, (B) 2<sup>nd</sup> cycle and (C) 10<sup>th</sup> cycle and (D) cyclic stability of H-SnO<sub>2</sub> calcined at 300 °C, 400 °C and 450 °C

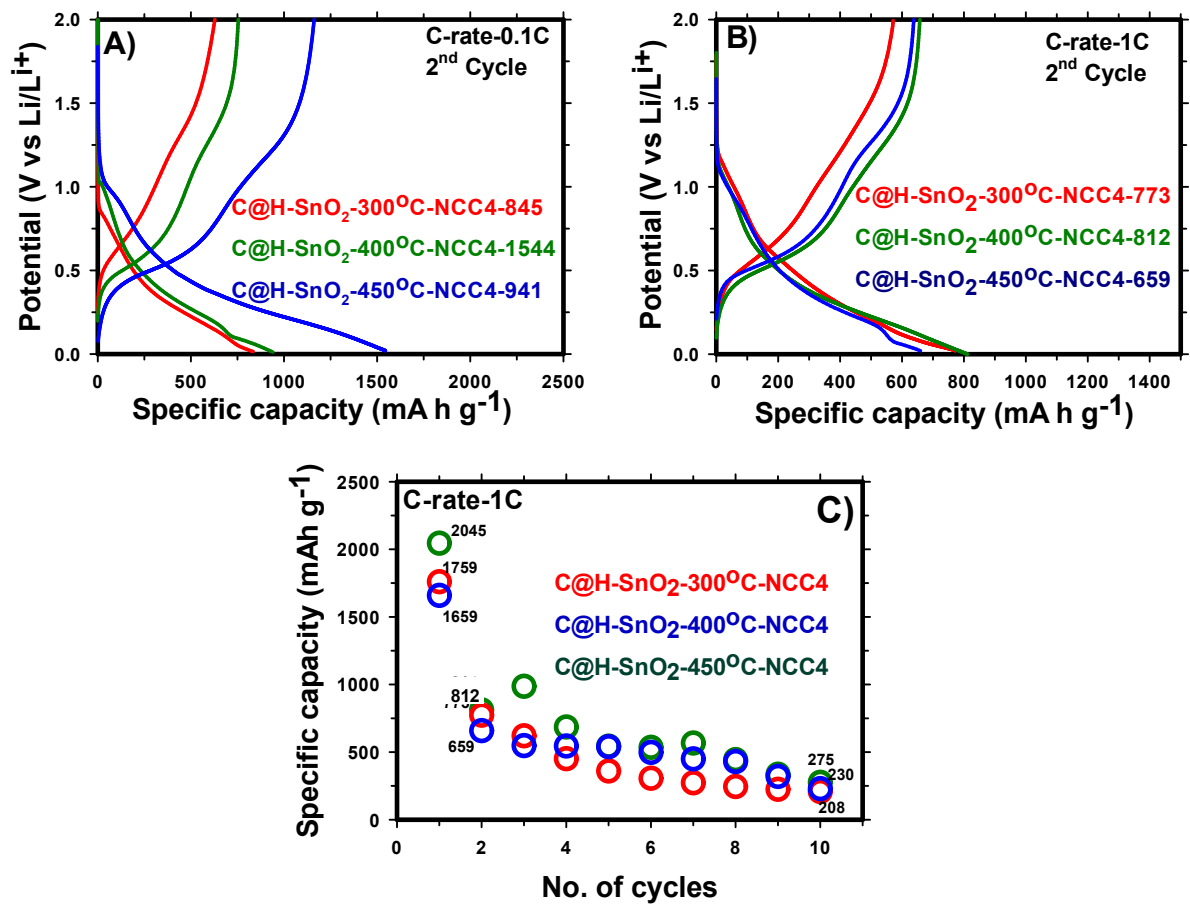

**Fig. S6:** Charge-discharge profile of carbon coated H-SnO<sub>2</sub> calcined at 300, 400 and 450 °C carbon coated by NCC-4 tested at (A) 0.1C, (B) 1C, (C) cyclic stability tested at 1C rate

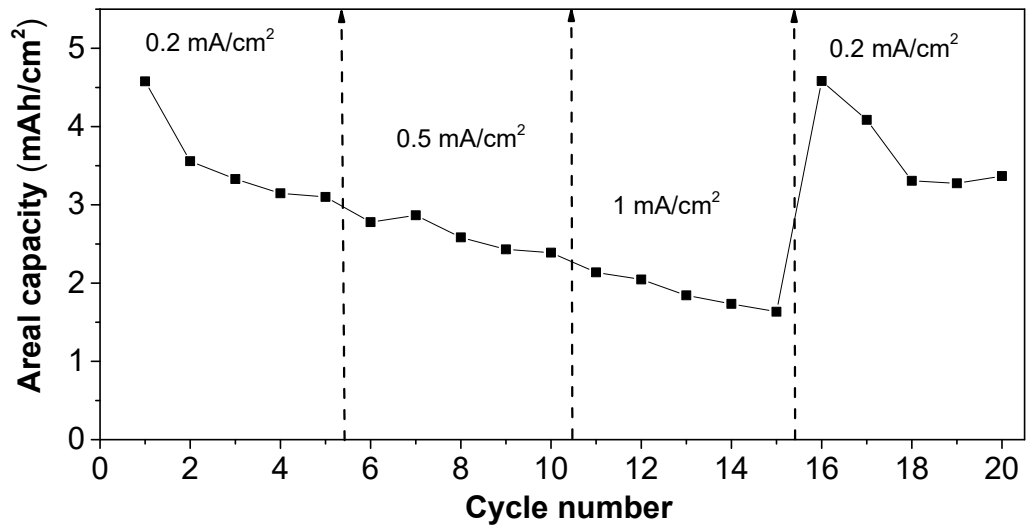

Fig. S7 Rate performance of C@H-SnO<sub>2</sub>-400 °C-NCC4



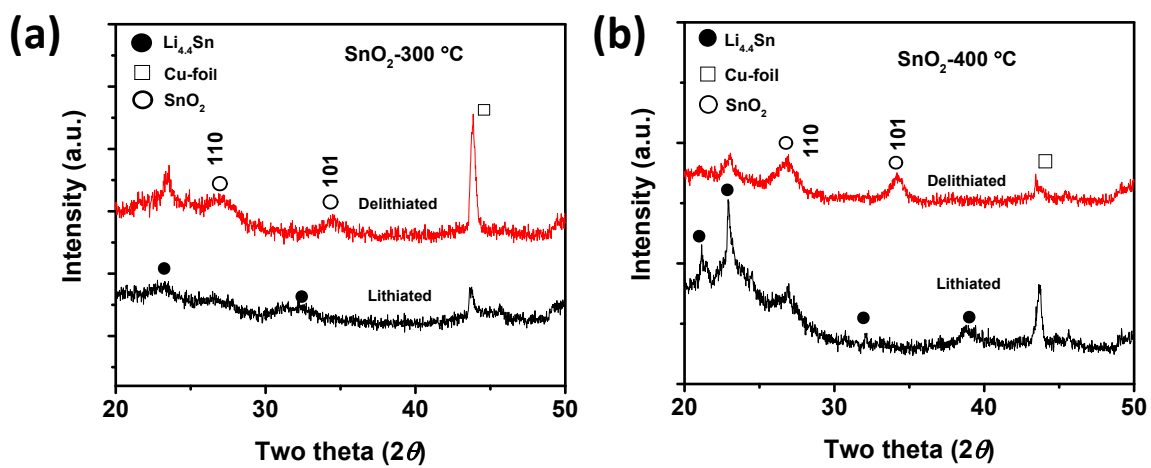

Fig. S8: XRD pattern for H-SnO<sub>2</sub> calcined at (a) 300 °C (b) 400 °C carbon coated by NCC-4

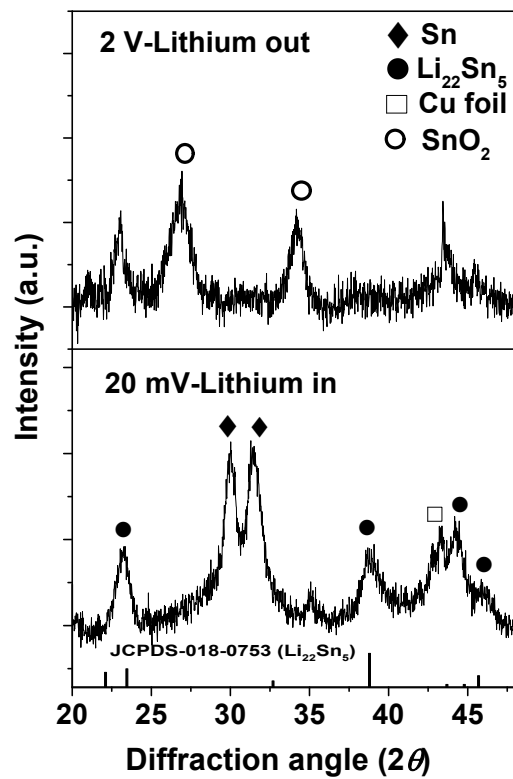

Fig. S9. Ex-situ XRD of H-SnO<sub>2</sub> after 50 cycles.

**Table S1:** XRD data of pure H-SnO<sub>2</sub> calcined at different temperatures and C@H-SnO<sub>2</sub> nanoparticles, UV-Vis data with UV-vis and TGA results

| Sample                     | Crystallite size (nm) | Lattice Parameters |        | Unit cell volume (Å <sup>3</sup> ) | Band gap (e.V) | Carbon content (TGA) |
|----------------------------|-----------------------|--------------------|--------|------------------------------------|----------------|----------------------|
|                            |                       | a=b                | c      |                                    |                |                      |
| H-SnO <sub>2</sub> -300 °C | 4.5                   | 4.7311             | 3.1867 | 71.33                              | 3.03           |                      |
| H-SnO <sub>2</sub> -400 °C | 5.1                   | 4.7342             | 3.186  | 71.4                               | 2.76           |                      |
| H-SnO <sub>2</sub> -450 °C | 6.8                   | 4.7381             | 3.186  | 71.54                              | 2.51           |                      |
| C@H-SnO <sub>2</sub> -NCC1 | 7.4                   | 4.7461             | 3.189  | 71.8                               |                | 3.5%                 |

|                            |     |        |        |       |  |      |
|----------------------------|-----|--------|--------|-------|--|------|
| C@H-SnO <sub>2</sub> -NCC2 | 7.3 | 4.7459 | 3.1752 | 71.52 |  | 4.7% |
| C@H-SnO <sub>2</sub> -NCC3 | 7.1 | 4.708  | 3.189  | 71.4  |  | 7.0% |
| C@H-SnO <sub>2</sub> -NCC4 | 7.7 | 4.7581 | 3.175  | 71.9  |  | 4.8% |

**Table S2.** XPS core level of Sn3d, O1s and C1s of C@H-SnO<sub>2</sub> NPs by CC1 and NCC4 condition

| Sample                   | Crystallite size (nm) | Binding energy (eV)                           | Binding energy (eV) C 1s | $\Delta$ (eV) for Sn 3d (spin-orbit coupling) | Binding energy (eV) O-1s (Deconvoluted) |
|--------------------------|-----------------------|-----------------------------------------------|--------------------------|-----------------------------------------------|-----------------------------------------|
|                          |                       | Sn-3d <sub>5/2</sub> and Sn-5d <sub>3/2</sub> |                          |                                               |                                         |
| C@H-SnO <sub>2</sub> -CC | 4.5                   | 487.087                                       | 284.5                    | 8.417                                         | 530.909                                 |
|                          |                       | 495.310                                       | 286.199                  |                                               | 531.587                                 |

---

|                            |     |         |         |       |         |
|----------------------------|-----|---------|---------|-------|---------|
| C@H-SnO <sub>2</sub> -NCC4 | 7.7 | 486.671 | 284.5   | 8.031 | 530.617 |
|                            |     | 495.210 | 285.437 |       | 532.179 |
|                            |     |         | 288.629 |       |         |

---
